# Supplementary material
Source: PubMed Central journal article supplement (PMC4068562)

Supplemental Figure 1: Internal quality control data for disk diffusion susceptibility testing in the clinical laboratory of the IMM Zurich (EUCAST recommended strains, values for drugs shown in this work)

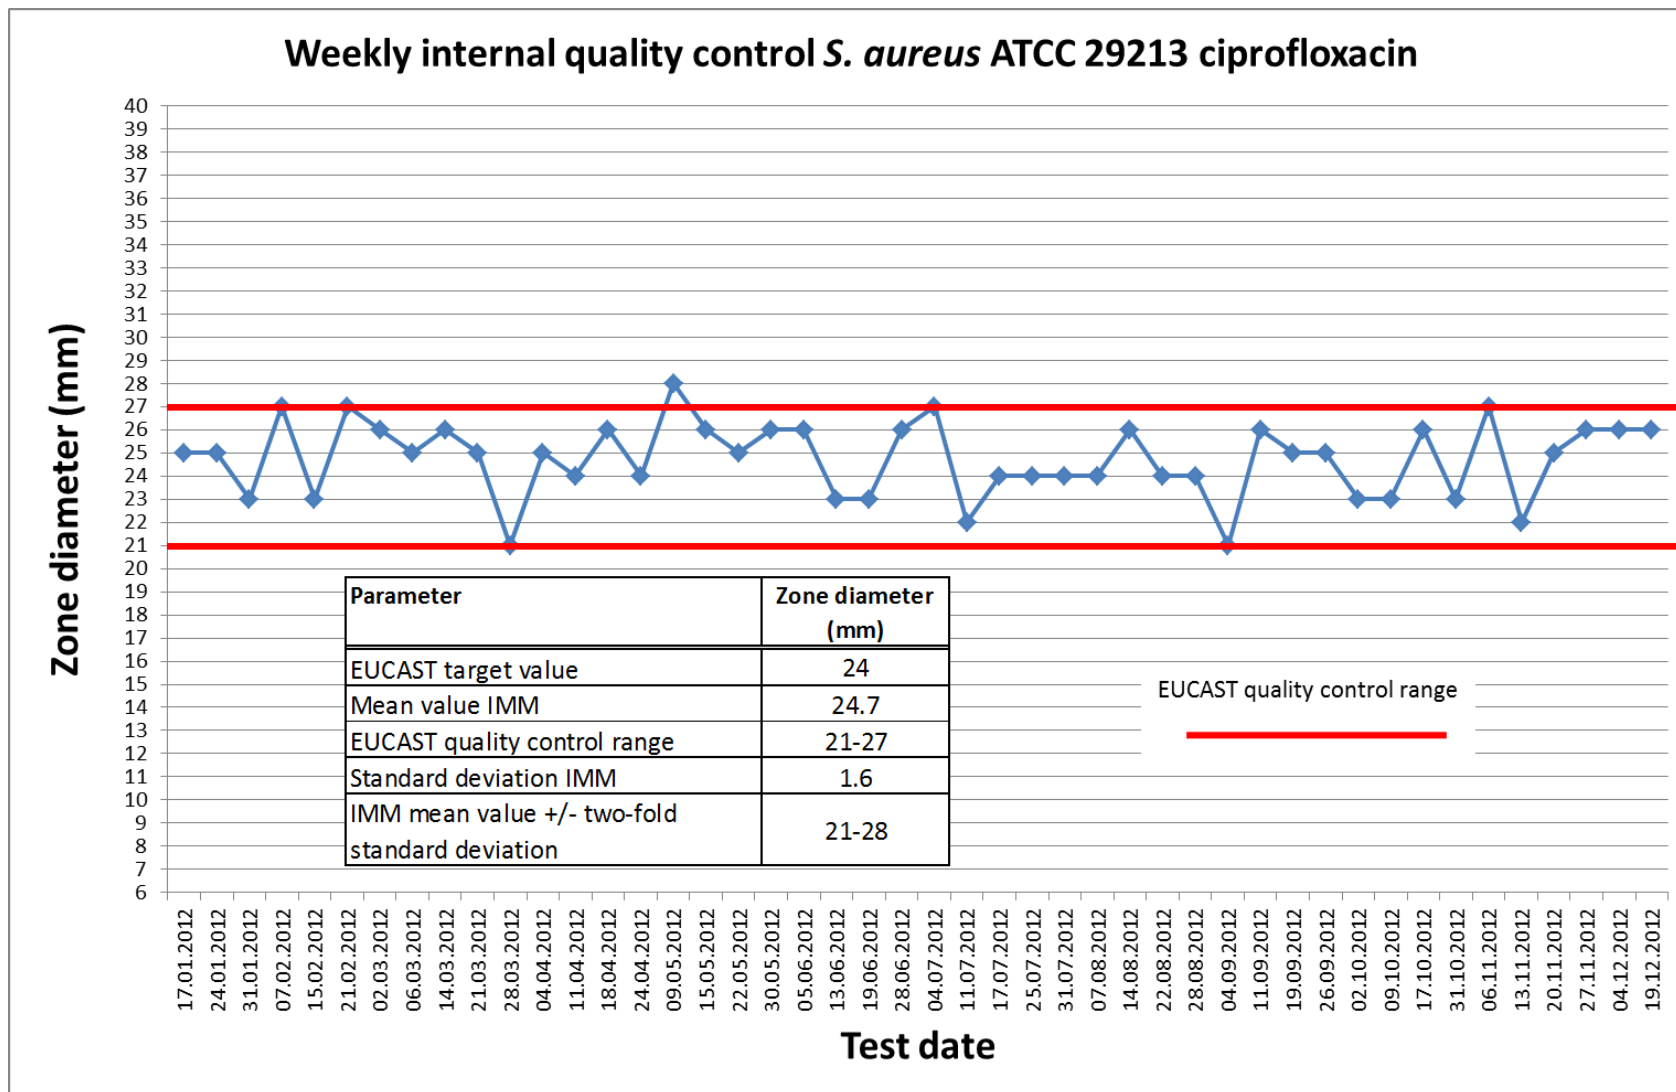

## Weekly internal quality control *S. aureus* ATCC 29213 levofloxacin

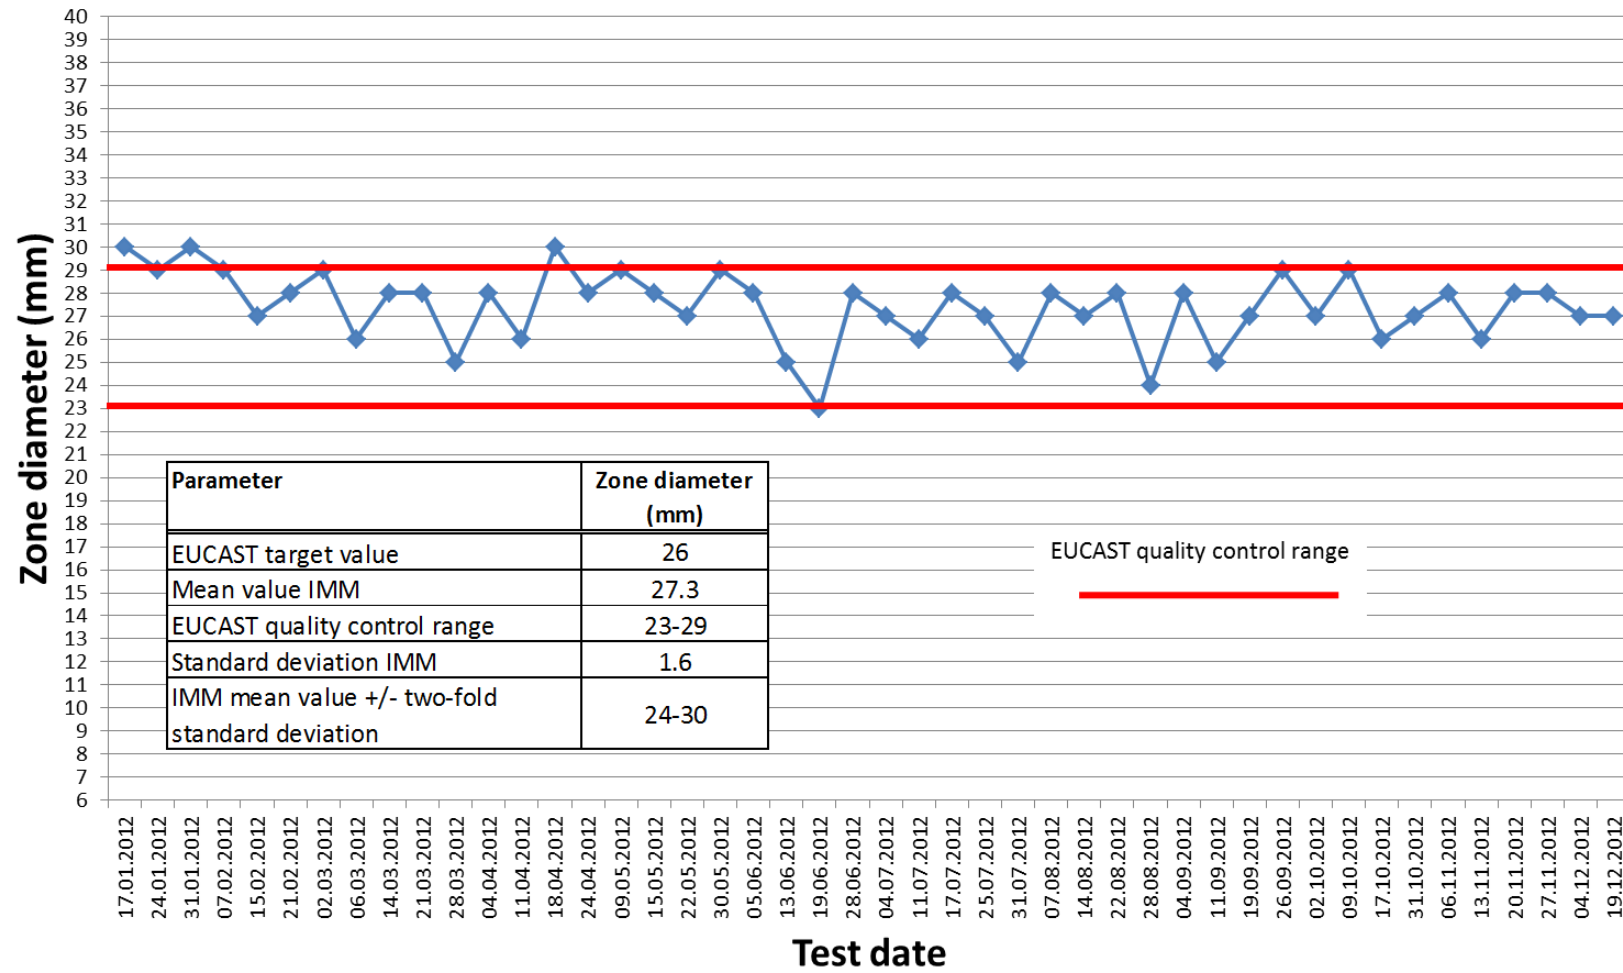

## Weekly internal quality control *S. aureus* ATCC 29213 amikacin

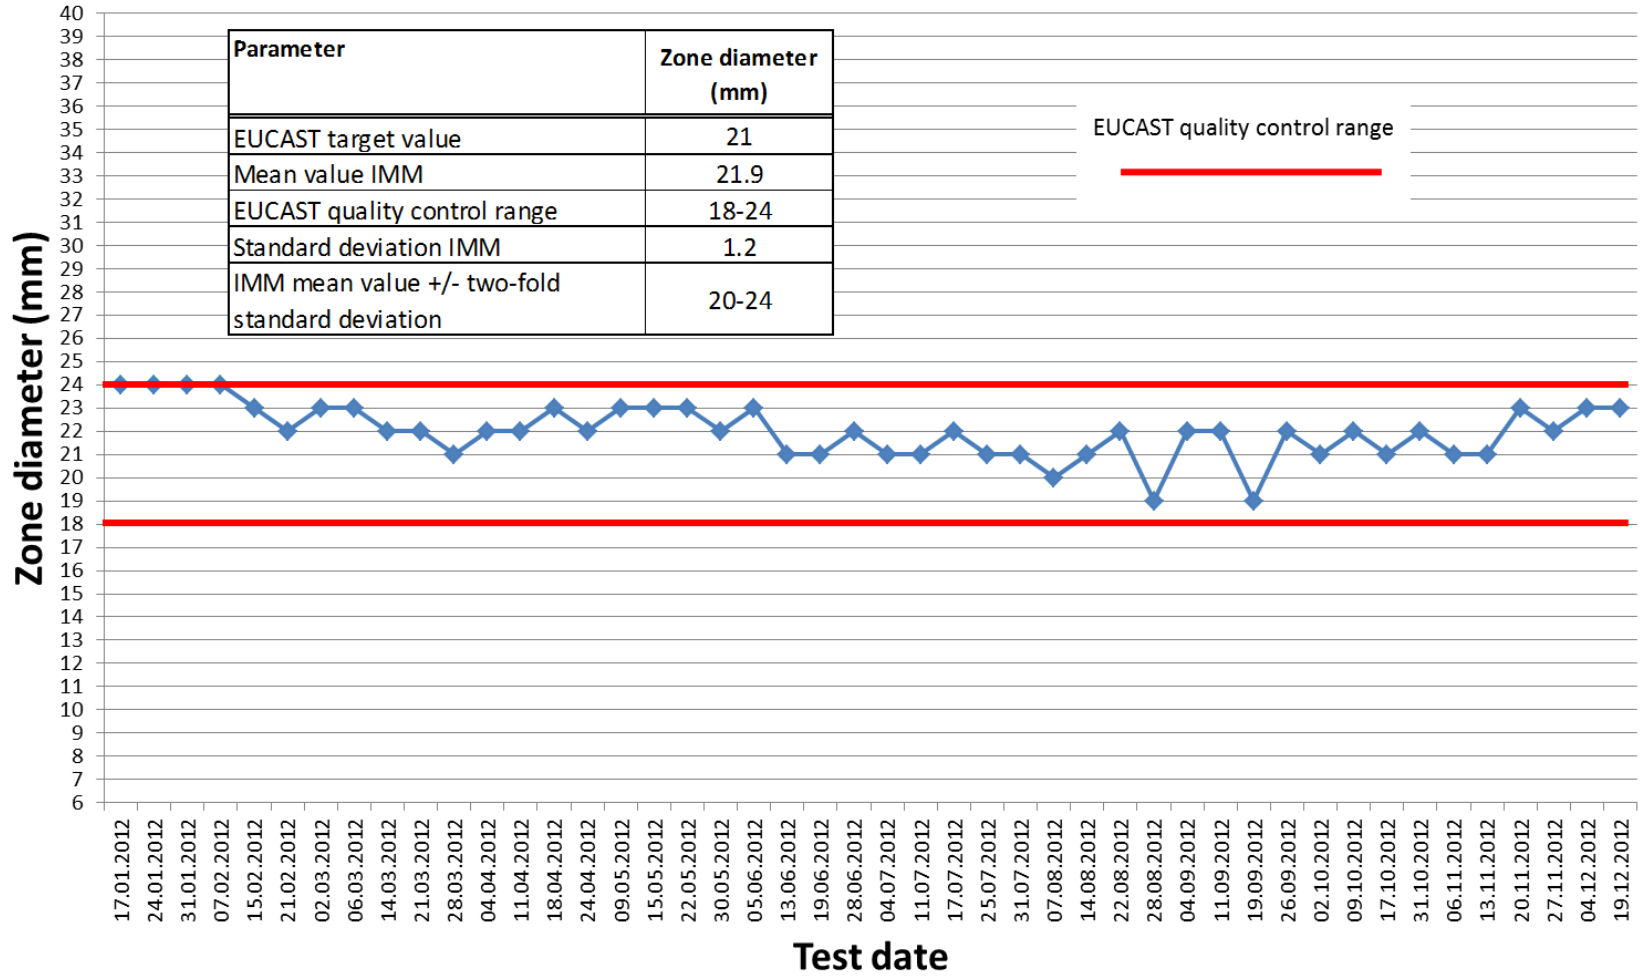

### Weekly internal quality control *E. coli* ATCC 25922 ertapenem 2012, IMM Zurich

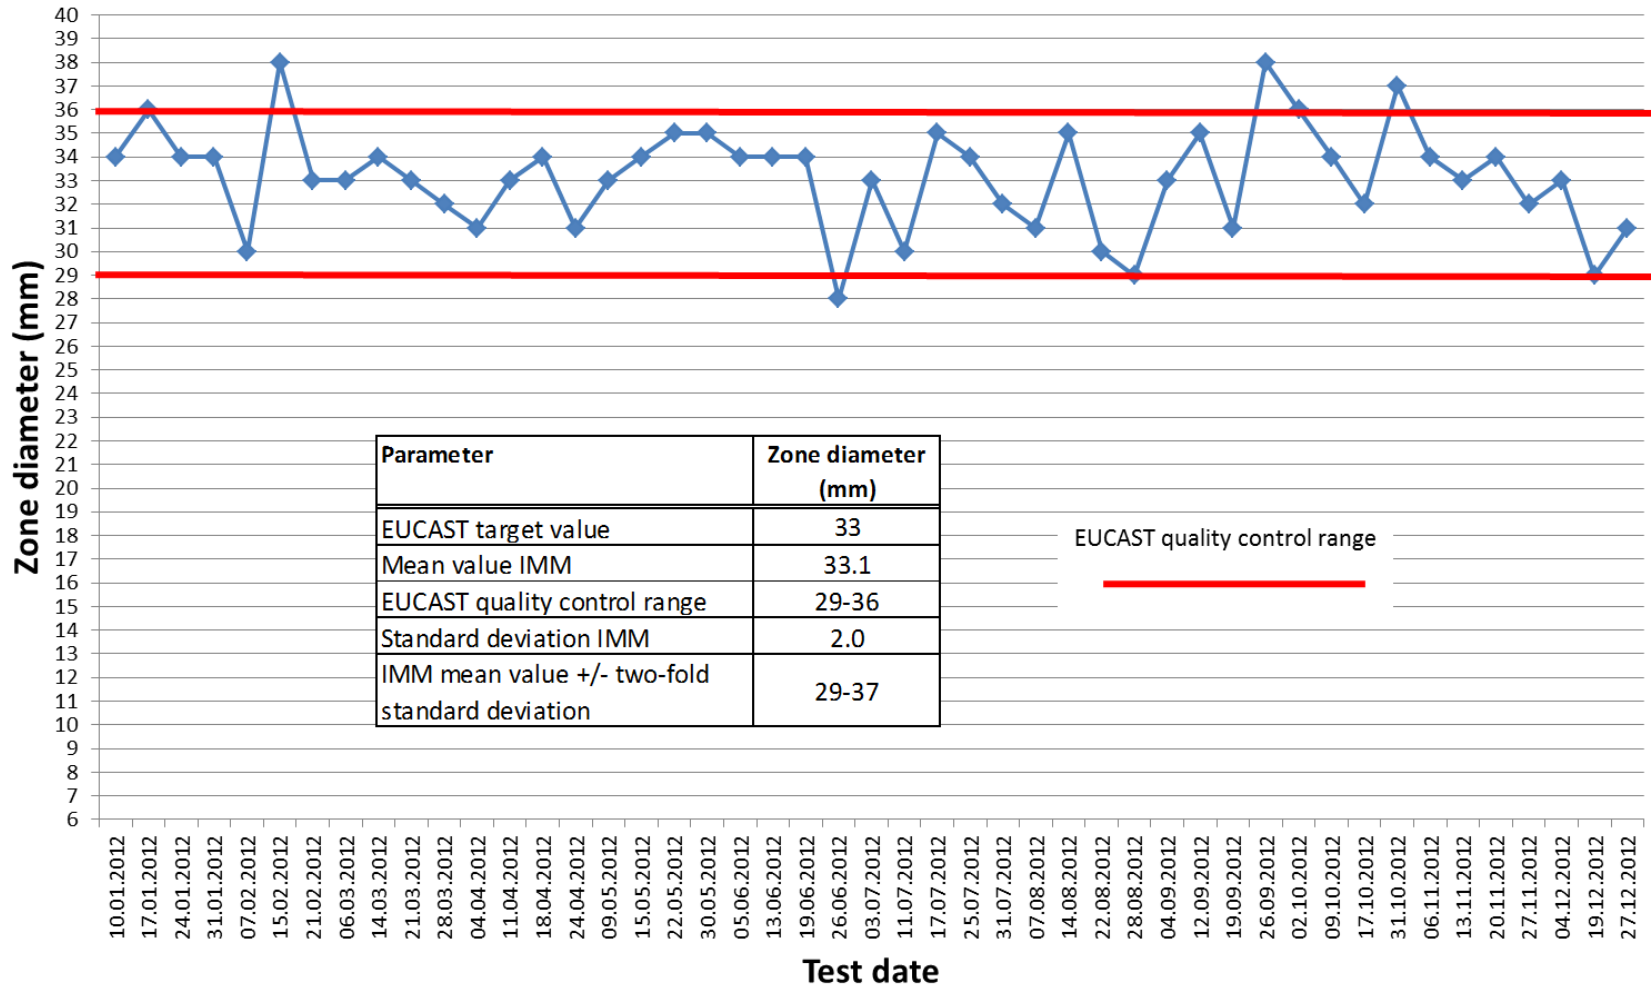

10.01.2012 17.01.2012 24.01.2012 31.01.2012 07.02.2012 15.02.2012 21.02.2012 06.03.2012 14.03.2012 21.03.2012 28.03.2012 04.04.2012 11.04.2012 18.04.2012 24.04.2012 09.05.2012 15.05.2012 22.05.2012 30.05.2012 05.06.2012 13.06.2012 19.06.2012 26.06.2012 03.07.2012 11.07.2012 17.07.2012 25.07.2012 31.07.2012 07.08.2012 14.08.2012 22.08.2012 28.08.2012 04.09.2012 12.09.2012 19.09.2012 26.09.2012 02.10.2012 09.10.2012 17.10.2012 31.10.2012 06.11.2012 13.11.2012 20.11.2012 27.11.2012 04.12.2012 19.12.2012 27.12.2012

Test date

### Weekly internal quality control *E. faecalis* ATCC 29212 gentamicin 30 µg disk

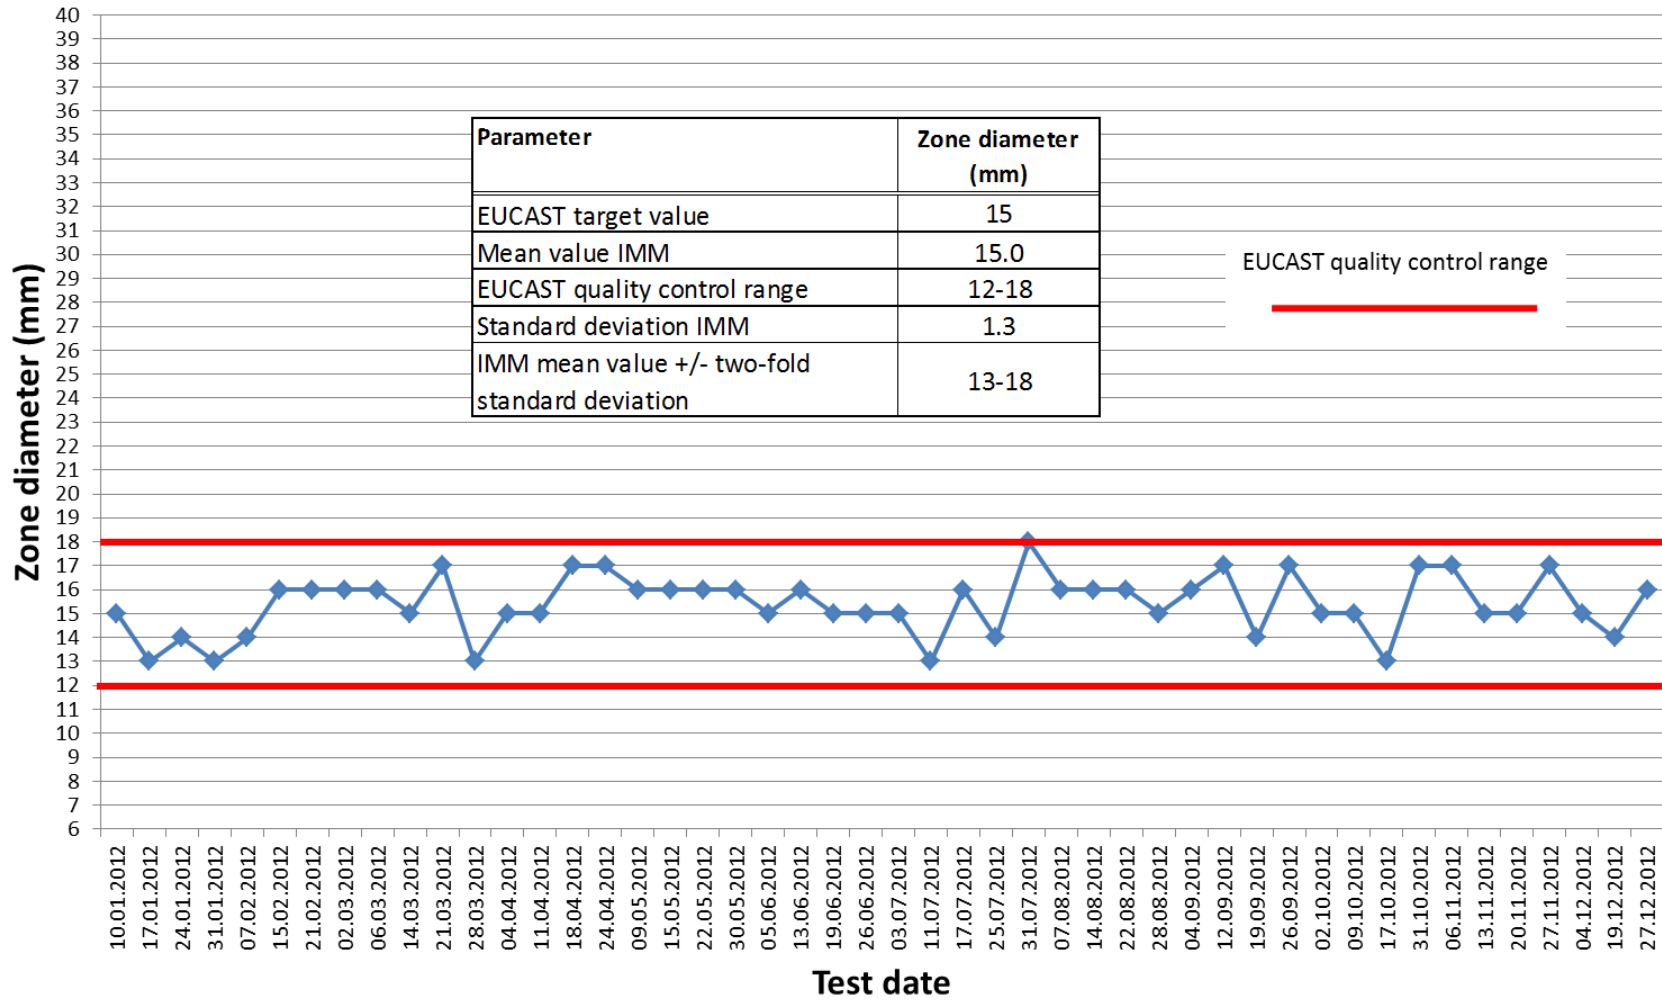

Supplement: AAC.02489-13_zac007143022so1.pdf [file AAC.02489-13_zac007143022so1.pdf]
